# Supplementary material for: Development, Establishment, and Validation of a Model for the Mineralization of Periodontium Remodelling Cells: Cementoblasts
Source: MDPI journal article supplement (doi:10.3390/ijms241813829), 2023-09-07
Supplement: s1 [file s1]

## Supplementary Materials

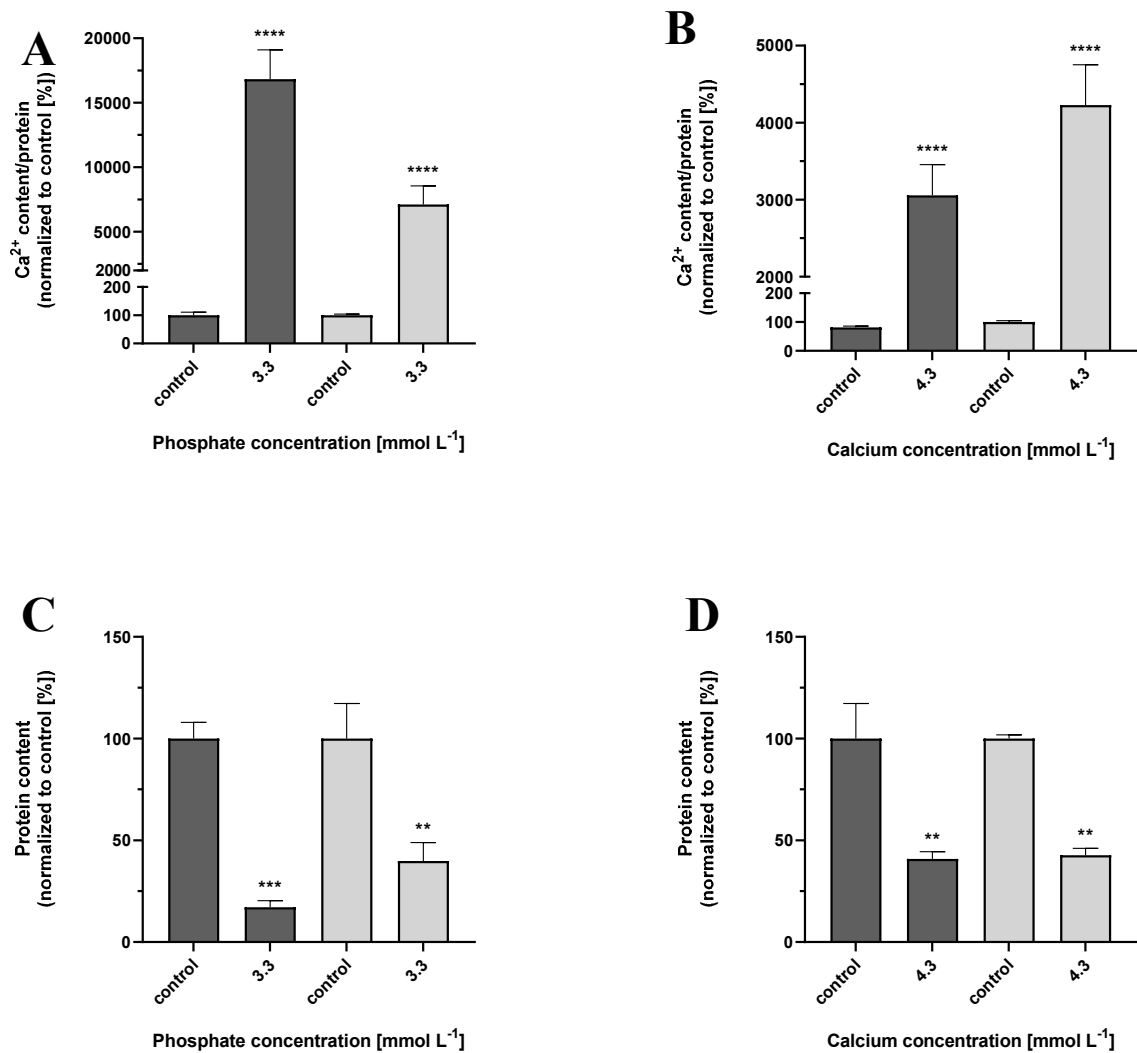

**Figure S1.** Cementoblast calcify in a concentration-dependent manner in response to high concentration of calcium and phosphate supplementation but show significant decrease in cell viability. Cementoblasts were incubated for three days with (A,C) 3.3 mmol L<sup>-1</sup> phosphate with constant concentrations of 3.8 mmol L<sup>-1</sup> (dark grey), or 2.3 mmol L<sup>-1</sup> (light grey) calcium, or (B,D) 4.3 mmol L<sup>-1</sup> calcium with constant concentrations of 2.8 mmol L<sup>-1</sup> (dark grey), or 2.3 mmol L<sup>-1</sup> (light grey) phosphate. Data are shown as means ± SEM (n = 9). \*\*P ≤ 0.01, \*\*\*P ≤ 0.001 and \*\*\*\*P ≤ 0.0001 compared with the control based on one-way ANOVA. Bonferroni's multiple comparisons were used as a post-test.
